# Supplementary material
Source: publisher site journal article supplement (https://www.dovepress.com/article/491153)
Supplement: Supplementary file 1 [file get_supplementary_file.php]

**Table S1** Univariate analysis of factors associated with overall survival

| Variables | Univariate analysis | | |
| --- | --- | --- | --- |
| HR | 95% CI | *P value* |
| Age | 1.005 | 0.964-1.047 | 0.831 |
| Male | 0.408 | 0.131-1.269 | 0.122 |
| BCLC C stage | 0.685 | 0.274-1.709 | 0.417 |
| PVTT Vp3 | 0.382 | 0.153-0.956 | 0.040 |
| AFP≤400 ng/ml | 0.359 | 0.124-1.040 | 0.059 |
| ECOG 1-2 | 0.074 | 0.019-0.282 | ＜0.001 |
| MELD＜10 | 1.267 | 0.537-2.987 | 0.589 |
| DST≥30 mm | 0.395 | 0.155-1.007 | 0.052 |
| Total stent length | 1.188 | 1.001-1.411 | 0.048 |

**Abbreviations**: ECOG score, East Coast Oncology Group score; BCLC, Barcelona Clinic Liver Cancer; PVTT, portal vein tumor thrombus; MELD, Model for End-Stage Liver Disease; AFP, alpha-fetoprotein; DST, distance between the distal end of stent and PVTT.
